# Supplementary material for: Efficient bifunctional materials based on pyrene- and triphenylamine-functionalized dendrimers for electroluminescent devices
Source: Royal Society of Chemistry journal article supplement (doi:10.1039/c5ra07161e), 2015-01-01
Supplement: c5ra07161e1.pdf [file c5ra07161e1.pdf]

# Supporting Information

## Efficient bifunctional materials based on pyrene- and triphenylamine-functionalized dendrimers for electroluminescent devices

T. Keawin,<sup>a</sup> N. Prachumrak,<sup>b</sup> S. Namuangruk,<sup>c</sup> S. Pansay,<sup>a</sup> N. Kungwan,<sup>d</sup> S. Maensiri,<sup>e</sup> S. Jungsuttiwong,<sup>a</sup> T. Sudyoadsuk<sup>b</sup> and V. Promarak<sup>b\*</sup>

<sup>a</sup> Department of Chemistry, Faculty of Science, Ubon Ratchathani University, Ubon Ratchathani 34190, Thailand.

<sup>b</sup> School of Molecular Science and Engineering, Vidyasirimedhi Institute of Science and Technology, Wangchan, Rayong, 21210 Thailand.

<sup>c</sup> National Nanotechnology Center, 130 Thailand Science Park, Klong Luang, Pathumthani 12120, Thailand.

<sup>d</sup> Chemistry Department, Faculty of Science, Chiang Mai University, Chiang Mai 50200, Thailand.

<sup>e</sup> School of Physics, Institute of Science, Suranaree University of Technology, Muang District, Nakhon Ratchasima 30000, Thailand.

\*E-mail: [pvinich@sut.ac.th](mailto:pvinich@sut.ac.th)

---

### Content:

|                                                        |            |
|--------------------------------------------------------|------------|
| <b>1. Quantum chemical calculation results</b>         | <b>S2</b>  |
| <b>2. Multiple CV scans</b>                            | <b>Sx</b>  |
| <b>3. EL spectra</b>                                   | <b>S9</b>  |
| <b>4. <sup>1</sup>H and <sup>13</sup>C NMR spectra</b> | <b>S10</b> |

### Quantum chemical calculation results

**Table S1** The calculated HOMO, LUMO and HOMO-LUMO energy gap ( $\Delta_{H-L}$ ) of the compounds by B3LYP/6-31G(d,p).

| Compounds    | HOMO (eV) | LUMO (eV) | $\Delta_{H-L}$ (eV) | $E_{ex}^a$ (eV/nm) |
|--------------|-----------|-----------|---------------------|--------------------|
| <b>G1PYR</b> | -5.14     | -1.67     | 3.48                | 3.11 (399)         |
| <b>G2PYR</b> | -5.13     | -1.67     | 3.46                | 3.11 (399)         |
| <b>G1TPA</b> | -4.86     | -0.91     | 3.96                | 3.40 (364)         |
| <b>G2TPA</b> | -4.86     | -1.18     | 3.68                | 3.31 (374)         |

<sup>a</sup> excitation energies from ground to excited states are calculated by TD-B3LYP/6-31G(d,p) in CH<sub>2</sub>Cl<sub>2</sub> solvent

**Table S2** The two lowest excitation of from ground to excited states are calculated by TD-B3LYP/6-31G(d,p) in CH<sub>2</sub>Cl<sub>2</sub> solvent.

| Compounds    |                       | $E_{ex}^a$ (eV/nm) | f      | Transition                                            |
|--------------|-----------------------|--------------------|--------|-------------------------------------------------------|
| <b>G1PYR</b> | $S_0 \rightarrow S_1$ | 3.11 (399)         | 0.5509 | 0.69(H $\rightarrow$ L)+0.11(H-2 $\rightarrow$ L)     |
|              | $S_0 \rightarrow S_2$ | 3.22 (386)         | 0.2298 | 0.69(H $\rightarrow$ L+1)+0.11(H-2 $\rightarrow$ L+1) |
| <b>G2PYR</b> | $S_0 \rightarrow S_1$ | 3.11 (399)         | 0.2200 | 0.51(H $\rightarrow$ L)+0.42(H-1 $\rightarrow$ L+1)   |
|              | $S_0 \rightarrow S_2$ | 3.11 (399)         | 0.8050 | 0.51(H $\rightarrow$ L+1)+0.43(H-1 $\rightarrow$ L)   |
| <b>G1TPA</b> | $S_0 \rightarrow S_1$ | 3.46 (358)         | 1.2204 | 0.66(H $\rightarrow$ L+1)+0.23(H-1 $\rightarrow$ L+2) |
|              | $S_0 \rightarrow S_2$ | 3.49 (355)         | 0.0009 | 0.68(H $\rightarrow$ L)                               |
| <b>G2TPA</b> | $S_0 \rightarrow S_1$ | 3.31 (374)         | 0.0089 | 0.68(H $\rightarrow$ L+1)+0.19(H-4 $\rightarrow$ L)   |
|              | $S_0 \rightarrow S_2$ | 3.36 (369)         | 0.0869 | 0.69(H-1 $\rightarrow$ L)                             |

Multiple CV scans

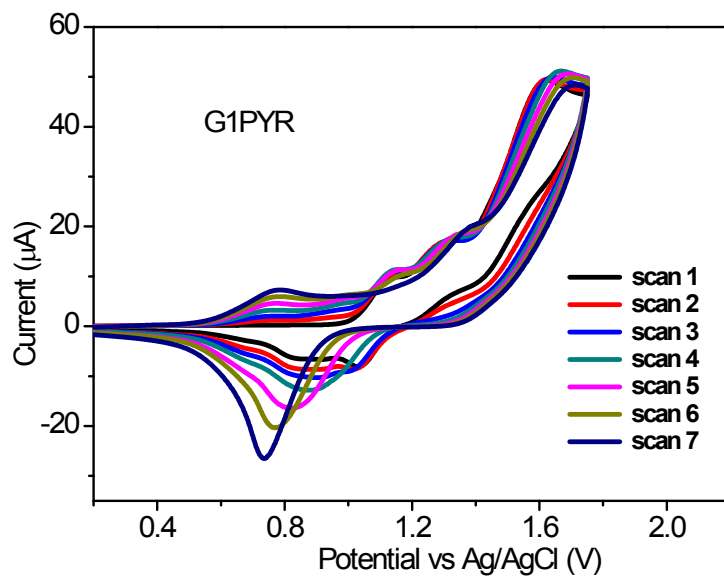

Fig. S1 CV traces measured in  $\text{CH}_2\text{Cl}_2/n\text{-Bu}_4\text{NPF}_6$  at scan rate of  $50 \text{ mV s}^{-1}$

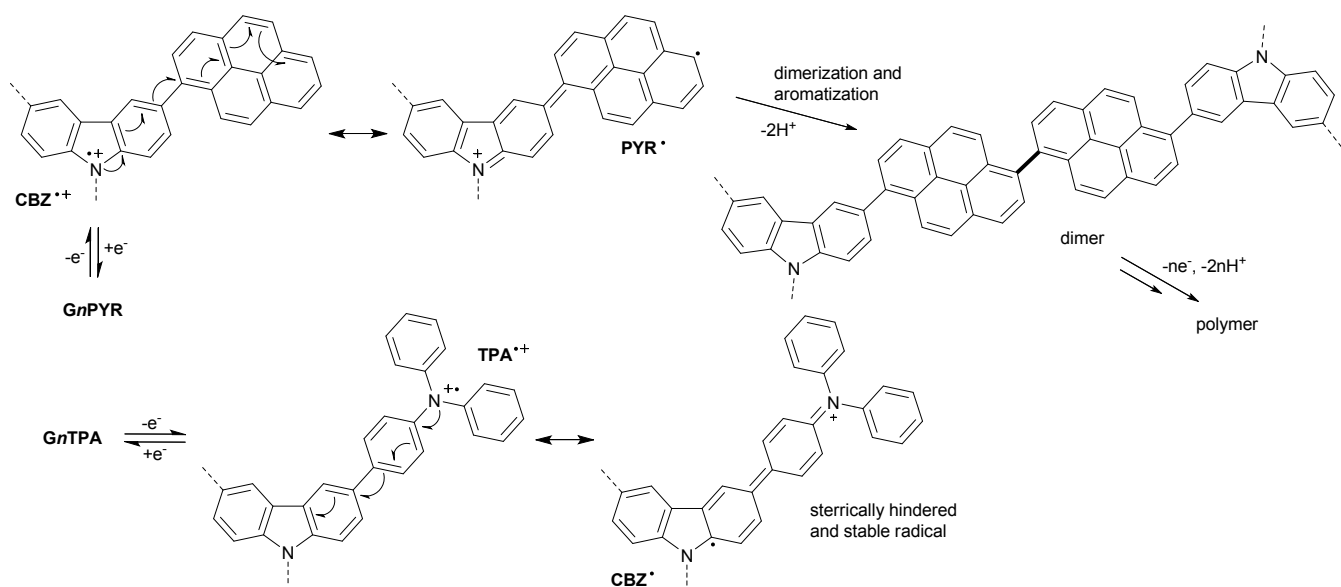

Fig. S2 Proposed oxidation and electrochemical coupling reaction of GnPYR and GnTPA under the CV experiments.

## EL spectra

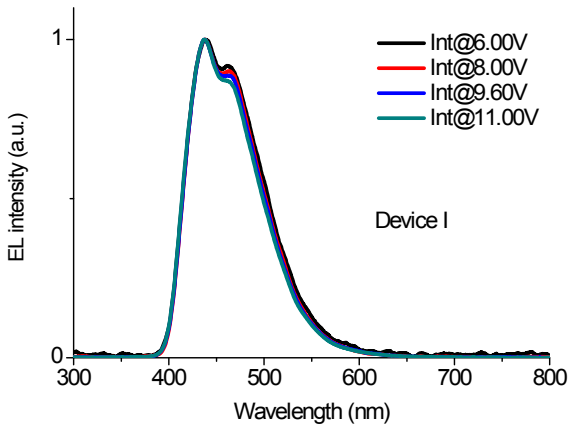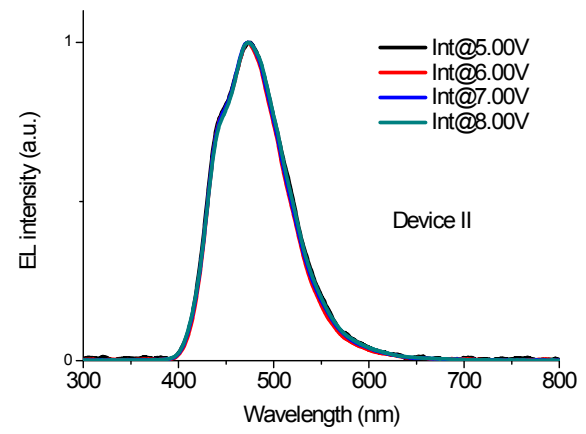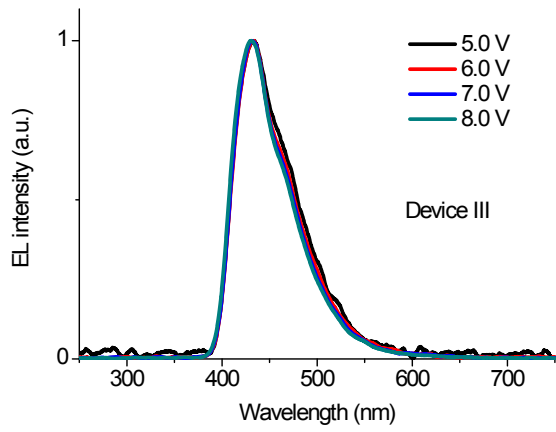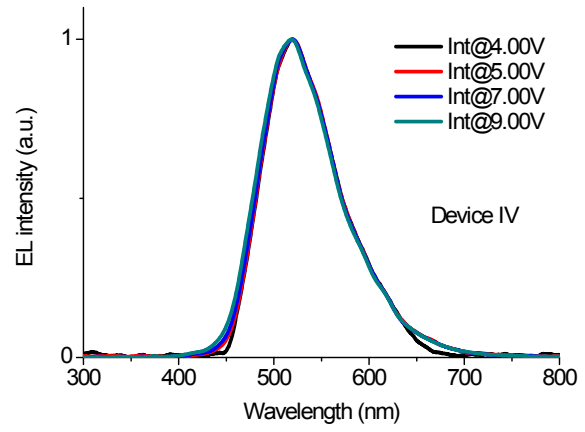

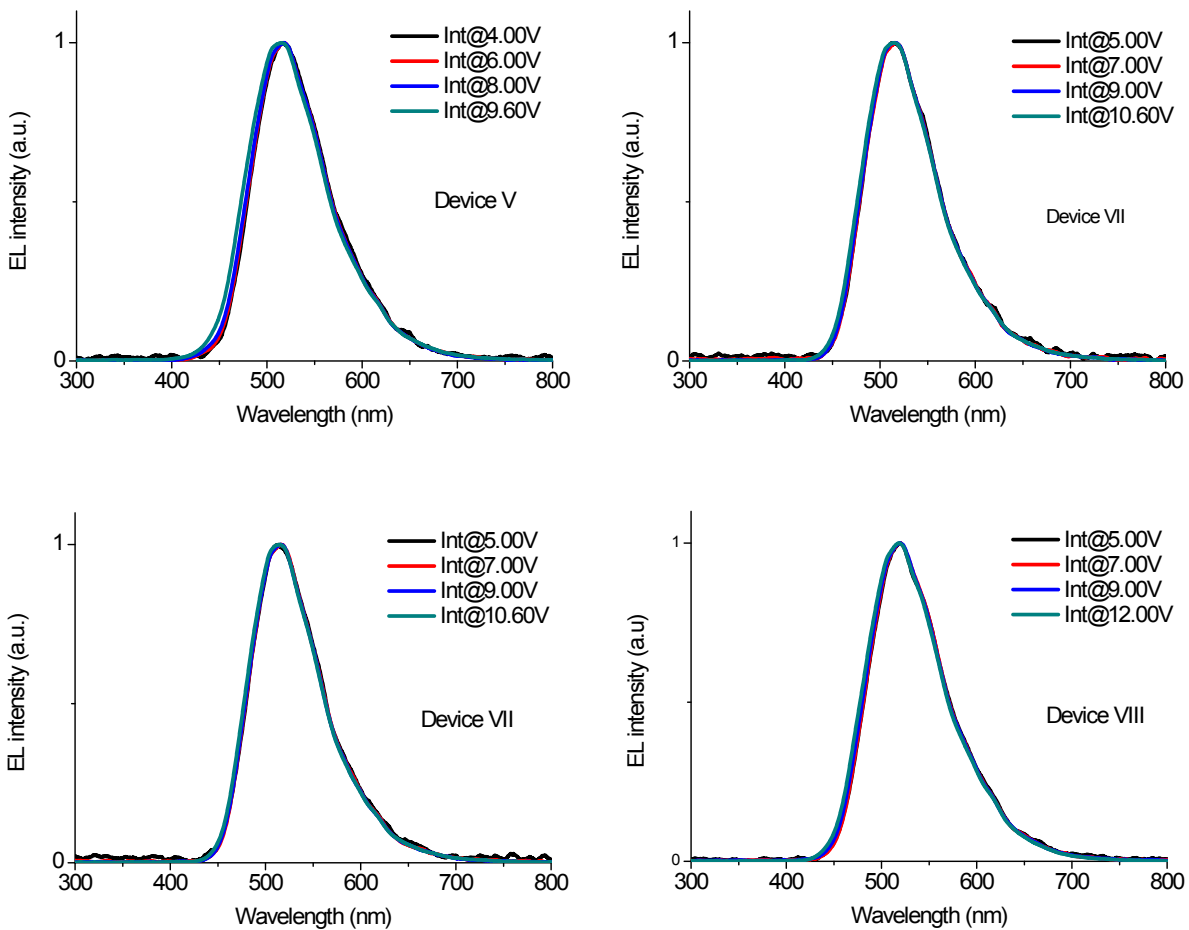

**Fig. S3** EL spectra of the OLEDs at different applied voltages

**<sup>1</sup>H-NMR and <sup>13</sup>C-NMR spectra  
Compound 2**

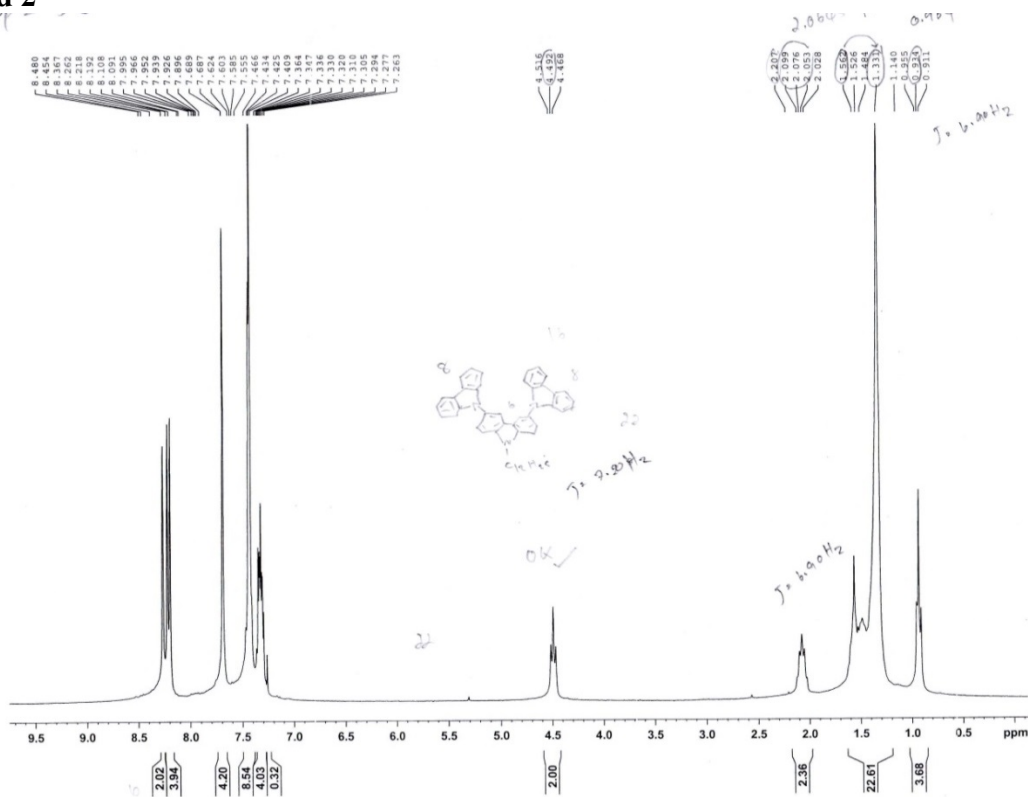

SPO2-50

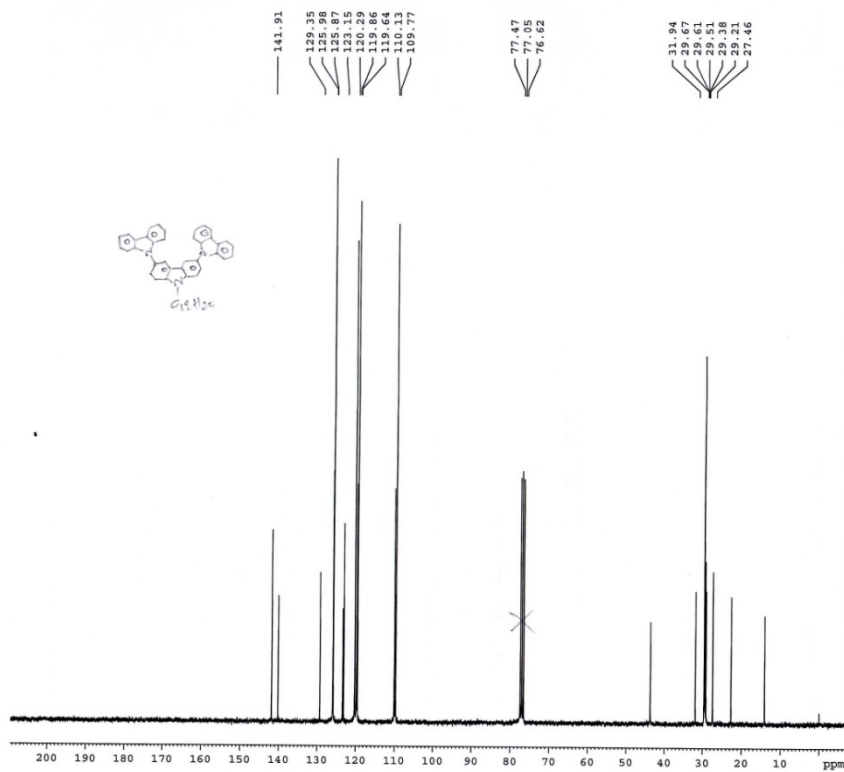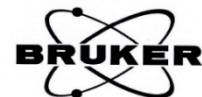

Current Data Parameters  
 NAME Nov2010  
 EXFO 260  
 PROCNO 1

F2 - Acquisition Parameters  
 Date\_ 20101221  
 Time 15.40  
 INSTRUM av300  
 PROBH 5 mm BBO BB-1H  
 PULPROG zgdc  
 TD 65536  
 SOLVENT CDCl3  
 NS 2048  
 DS 2  
 SWH 17985.611 Hz  
 FIDRES 0.274439 Hz  
 AQ 1.8219508 sec  
 RG 2580.3  
 DW 27.800 usec  
 DE 6.00 usec  
 TE 300.0 K  
 D1 2.00000000 sec  
 d11 0.03000000 sec

===== CHANNEL f1 =====  
 NUC1 13C  
 P1 7.60 usec  
 PL1 -3.00 dB  
 SFO1 75.4752953 MHz

===== CHANNEL f2 =====  
 CPDPRG2 waltz16  
 NUC2 1H  
 PCPD2 96.00 usec  
 PL2 -6.00 dB  
 PL12 6.00 dB  
 SFO2 300.1312005 MHz

F2 - Processing parameters  
 SI 32768  
 SF 75.4677490 MHz  
 WDW EM  
 SSB 0  
 LB 1.00 Hz  
 GB 0  
 PC 1.00

**Compound 3**

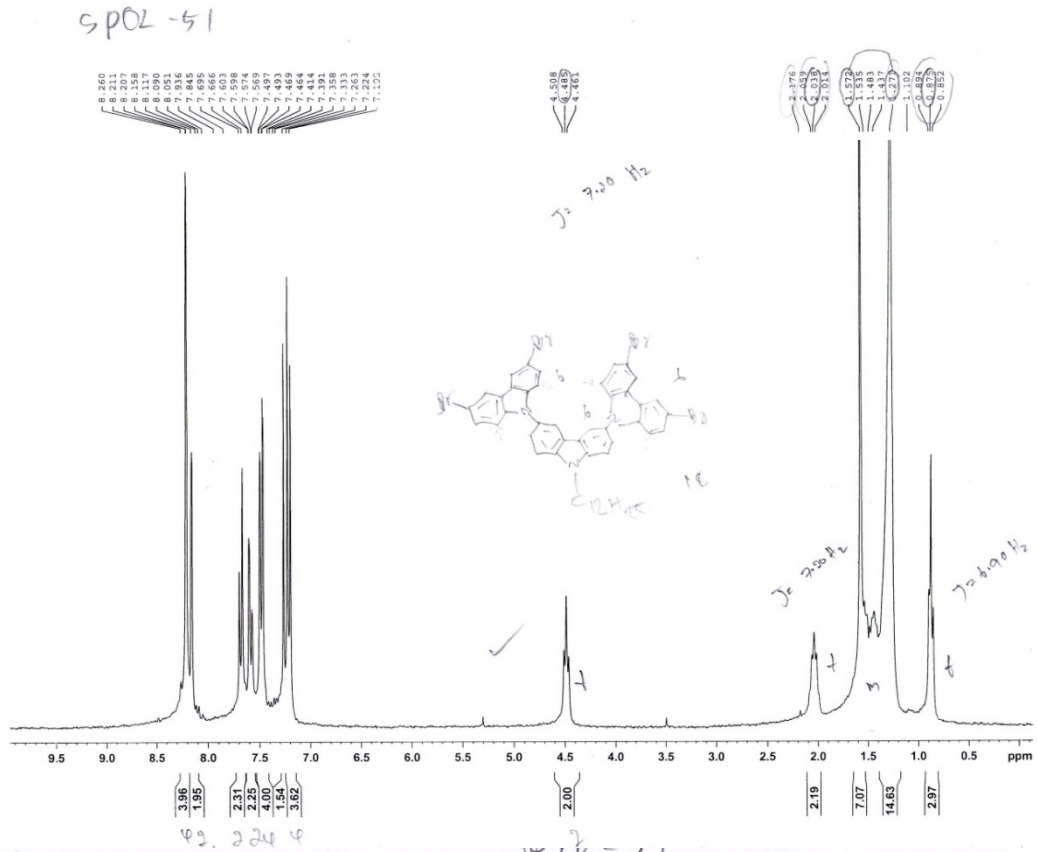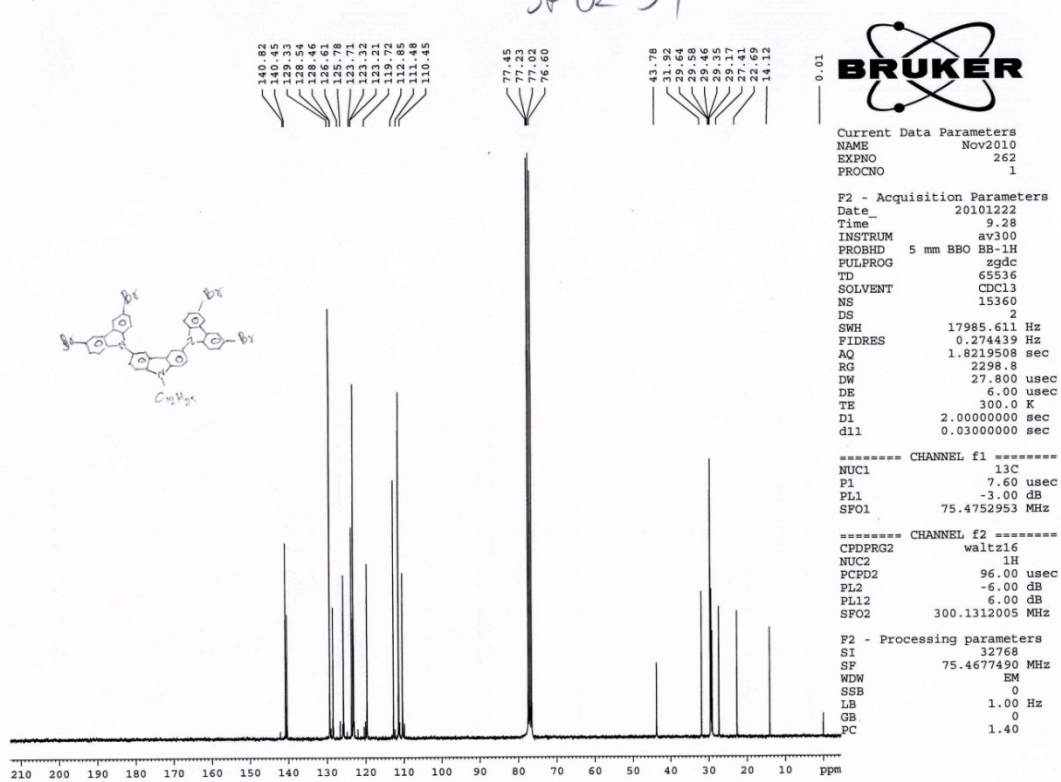

Compound G1PYR

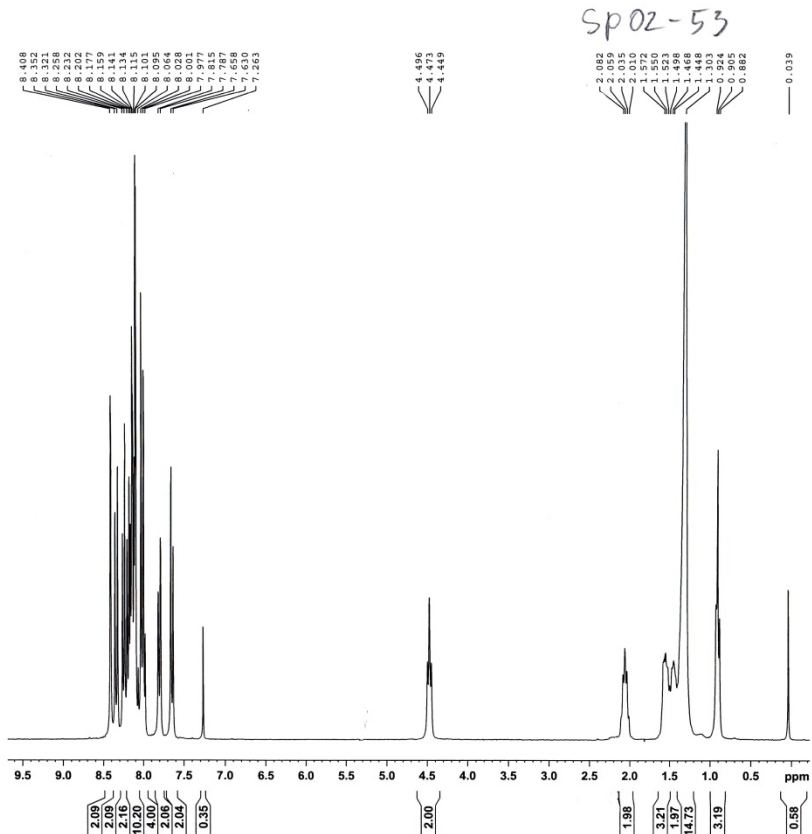

Current Data Parameters  
 NAME Nov2010  
 EXPNO 99  
 PROCNO 1

F2 - Acquisition Parameters  
 Date 20101203  
 Time 17.40  
 INSTRUM av300  
 PROBHD 5 mm BBO BB-1H  
 PULPROG zg  
 TD 32768  
 SOLVENT CDCl3  
 NS 1  
 DS 0  
 SWH 4496.403 Hz  
 FIDRES 0.137219 Hz  
 AQ 3.6439515 sec  
 RG 101.6  
 DW 111.200 usec  
 DE 6.00 usec  
 TE 300.0 K  
 D1 1.00000000 sec

\*\*\*\*\* CHANNEL f1 \*\*\*\*\*  
 NUC1 1H  
 P1 16.50 usec  
 PL1 -6.00 dB  
 SF01 300.1313506 MHz

F2 - Processing parameters  
 SI 16384  
 SF 300.1300053 MHz  
 WDW EM  
 SSB 0  
 LB 1.00 Hz  
 GB 0  
 PC 1.00

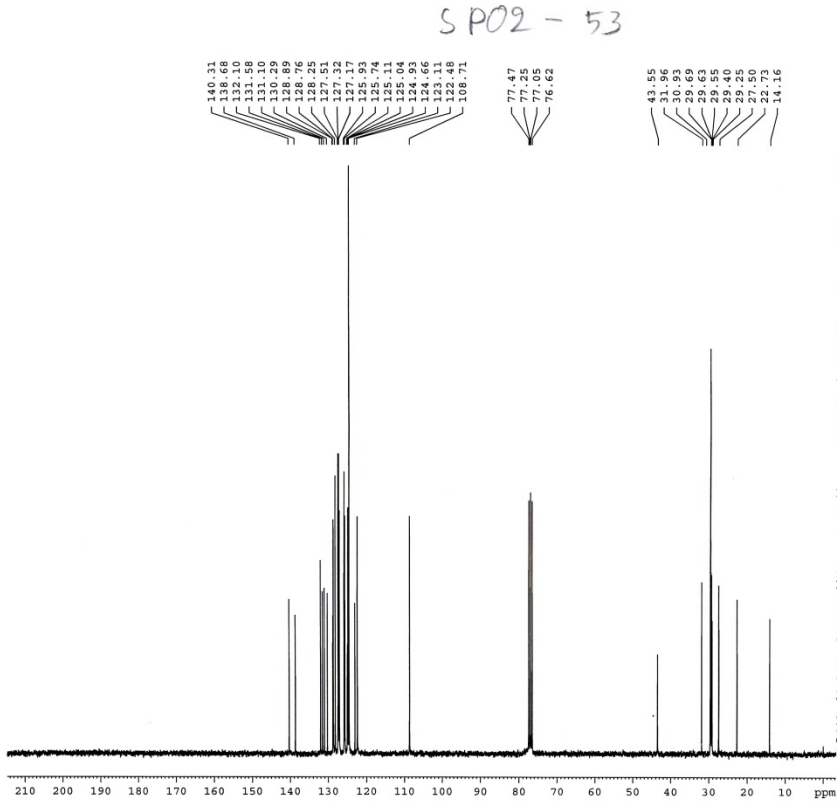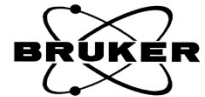

Current Data Parameters  
 NAME Nov2010  
 EXPNO 100  
 PROCNO 1

F2 - Acquisition Parameters  
 Date 20101203  
 Time 19.55  
 INSTRUM av300  
 PROBHD 5 mm BBO BB-1H  
 PULPROG zgdc  
 TD 65536  
 SOLVENT CDCl3  
 NS 2048  
 DS 2  
 SWH 17985.611 Hz  
 FIDRES 0.274439 Hz  
 AQ 1.8219508 sec  
 RG 724.1  
 DW 27.800 usec  
 DE 6.00 usec  
 TE 300.0 K  
 D1 2.00000000 sec  
 d11 0.03000000 sec

\*\*\*\*\* CHANNEL f1 \*\*\*\*\*  
 NUC1 13C  
 P1 7.60 usec  
 PL1 -3.00 dB  
 SF01 75.4752953 MHz

\*\*\*\*\* CHANNEL f2 \*\*\*\*\*  
 CFP2PRG2 waltz16  
 NUC2 1H  
 PCPD2 96.00 usec  
 PL2 -6.00 dB  
 PL12 6.00 dB  
 SF02 300.1312005 MHz

F2 - Processing parameters  
 SI 32768  
 SF 75.4677490 MHz  
 WDW EM  
 SSB 0  
 LB 1.00 Hz  
 GB 0  
 PC 1.40



Compound G2PYR

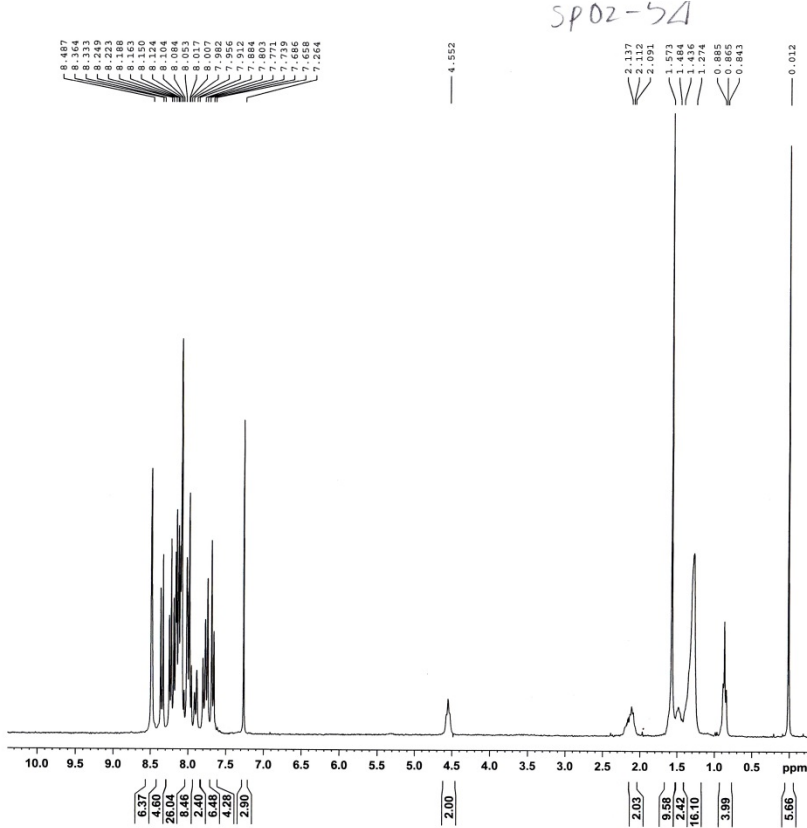

Current Data Parameters  
 NAME Nov2010  
 EXPNO 84  
 PROCNO 1

F2 - Acquisition Parameters  
 Date\_ 20101202  
 Time\_ 17.10  
 INSTRUM av300  
 PROBHD 5 mm BBO BB-1H  
 PULPROG zg  
 TD 32768  
 SOLVENT CDCl3  
 NS 1  
 DS 0  
 SWH 4496.403 Hz  
 FIDRES 0.137219 Hz  
 AQ 3.6438515 sec  
 RG 256  
 DW 111.200 usec  
 DE 6.00 usec  
 TE 300.0 K  
 D1 1.00000000 sec

===== CHANNEL f1 =====  
 NUC1 1H  
 P1 16.50 usec  
 PL1 -6.00 dB  
 SFO1 300.1313506 MHz

F2 - Processing parameters  
 SI 16384  
 SF 300.130053 MHz  
 WDW EM  
 SSB 0  
 LB 1.00 Hz  
 GB 0  
 PC 1.00

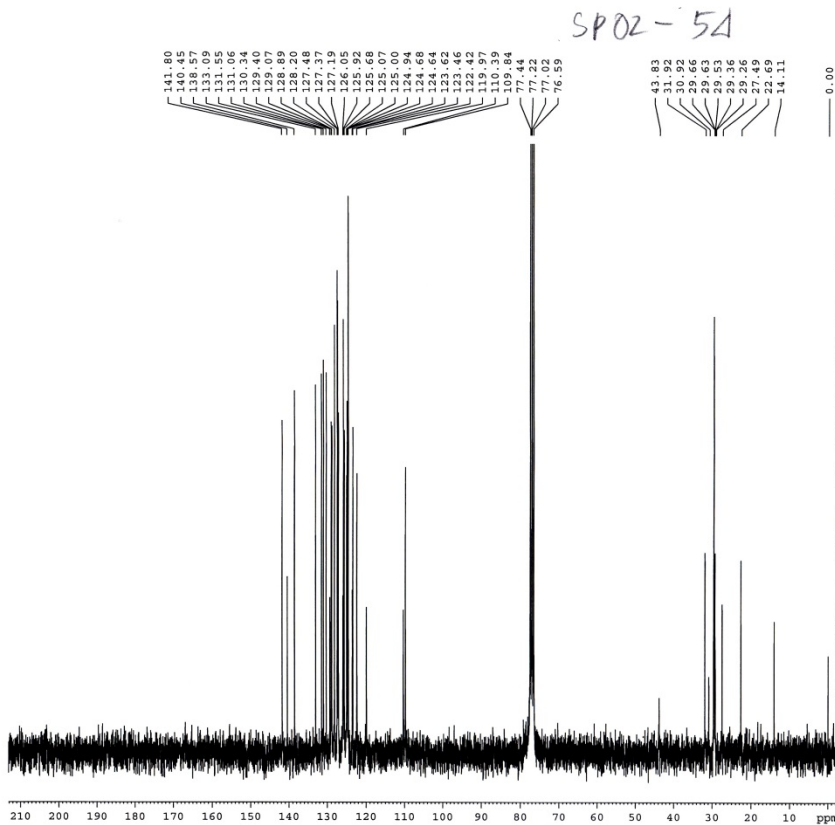

**BRUKER**

Current Data Parameters  
 NAME Nov2010  
 EXPNO 85  
 PROCNO 1

F2 - Acquisition Parameters  
 Date\_ 20101202  
 Time\_ 20.13  
 INSTRUM av300  
 PROBHD 5 mm BBO BB-1H  
 PULPROG zgdc  
 TD 65536  
 SOLVENT CDCl3  
 NS 2816  
 DS 2  
 SWH 17985.611 Hz  
 FIDRES 0.274439 Hz  
 AQ 1.8219508 sec  
 RG 1290.2  
 DW 27.800 usec  
 DE 6.00 usec  
 TE 300.0 K  
 D1 2.00000000 sec  
 d11 0.03000000 sec

===== CHANNEL f1 =====  
 NUC1 13C  
 P1 7.60 usec  
 PL1 -3.00 dB  
 SFO1 75.4752953 MHz

===== CHANNEL f2 =====  
 CPDPRG2 waltz16  
 NUC2 1H  
 PCPD2 96.00 usec  
 PL2 -6.00 dB  
 FL12 6.00 dB  
 SFO2 300.1312005 MHz

F2 - Processing parameters  
 SI 32768  
 SF 75.4677490 MHz  
 WDW EM  
 SSB 0  
 LB 1.00 Hz  
 GB 0  
 PC 1.40

Compound G1TPA

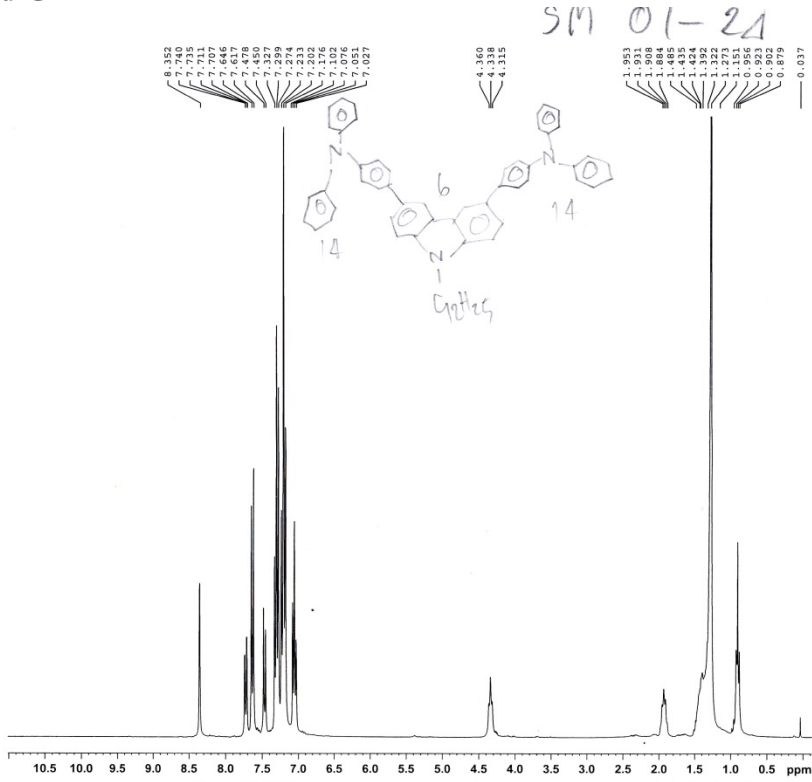

Current Data Parameters  
 NAME 11nov2011  
 EXPNO 116  
 PROCNO 1

F2 - Acquisition Parameters  
 Date\_ 20120127  
 Time 17.36  
 INSTRUM av300  
 PROBHD 5 mm BBO BB-1H  
 PULPROG zg  
 TD 32768  
 SOLVENT CDCl3  
 NS 4  
 DS 0  
 SWH 4496.403 Hz  
 FIDRES 0.137219 Hz  
 AQ 3.6438515 sec  
 RG 64  
 DW 111.200 usec  
 DE 6.00 usec  
 TE 300.0 K  
 D1 1.00000000 sec

===== CHANNEL f1 =====  
 NUC1 1H  
 P1 16.50 usec  
 PL1 -6.00 dB  
 SFO1 300.1313506 MHz

F2 - Processing parameters  
 SI 16384  
 SF 300.1300053 MHz  
 WDW EM  
 SSB 0  
 LB 1.00 Hz  
 GB 0  
 PC 1.00

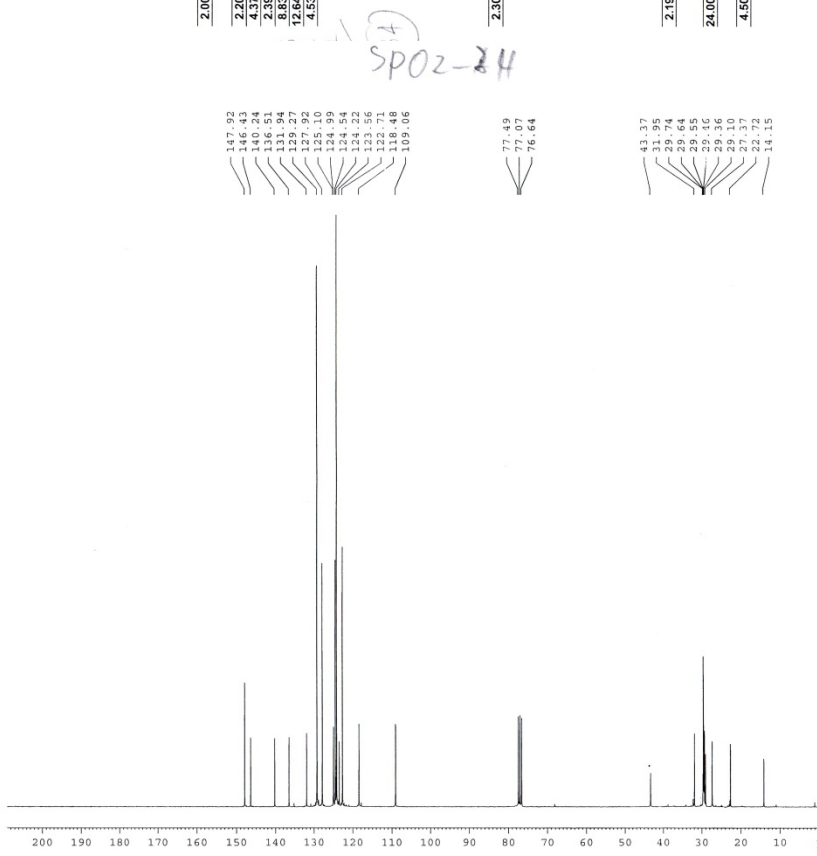

**BRUKER**

Current Data Parameters  
 NAME 15july09  
 EXPNO 218  
 PROCNO 1

F2 - Acquisition Parameters  
 Date\_ 20090903  
 Time 10.07  
 INSTRUM av300  
 PROBHD 5 mm BBO BB-1H  
 PULPROG zgdc  
 TD 65536  
 SOLVENT CDCl3  
 NS 10240  
 DS 2  
 SWH 17985.611 Hz  
 FIDRES 0.274439 Hz  
 AQ 1.8219508 sec  
 RG 1290.2  
 DW 27.800 usec  
 DE 6.00 usec  
 TE 300.0 K  
 D1 2.00000000 sec  
 d11 0.03000000 sec

===== CHANNEL f1 =====  
 NUC1 13C  
 P1 7.40 usec  
 PL1 -3.00 dB  
 SFO1 75.4752953 MHz

===== CHANNEL f2 =====  
 CDPGR2 waltz16  
 NUC2 1H  
 PCPD2 100.00 usec  
 PL2 -6.00 dB  
 PL12 6.30 dB  
 SFO2 300.1312005 MHz

F2 - Processing parameters  
 SI 32768  
 SF 75.4677490 MHz  
 WDW EM  
 SSB 0  
 LB 1.00 Hz  
 GB 0  
 PC 1.40

**Compound G2TPA**

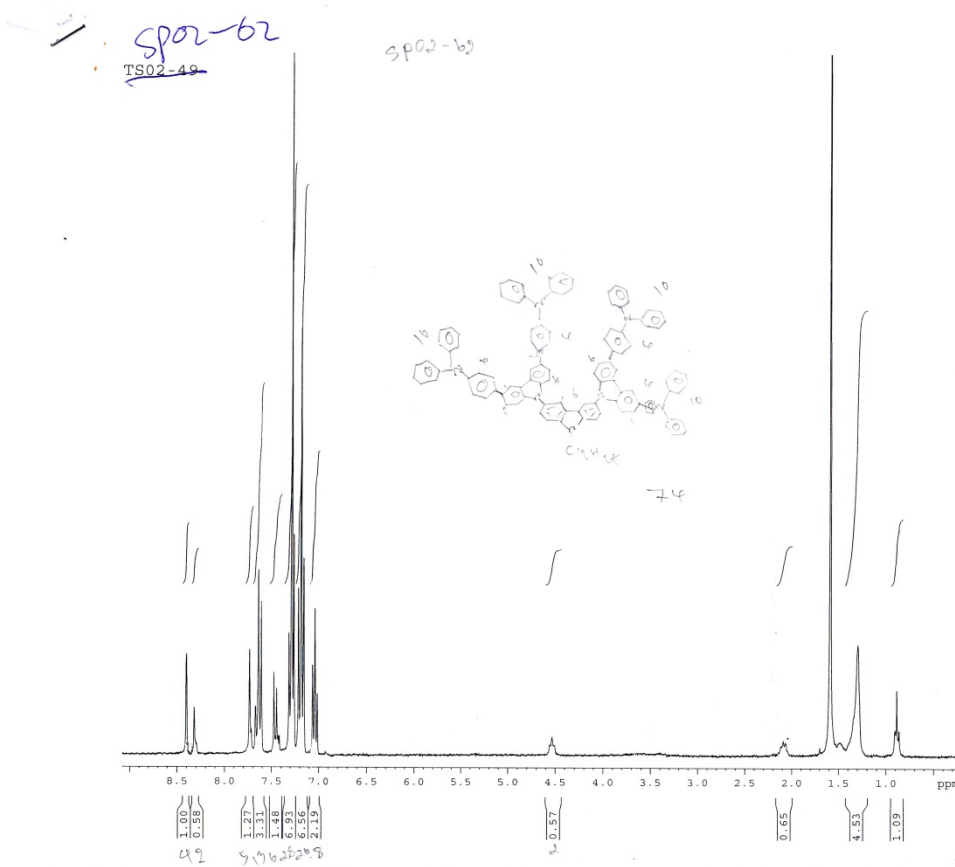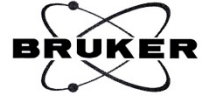

Current Data Parameters  
 NAME 15july09  
 EXPNO 180  
 PROCNO 1

F2 - Acquisition Parameters  
 Date\_ 20090825  
 Time 16.04  
 INSTRUM av300  
 PROBHD 5 mm BBO BB-1H  
 PULPROG zg  
 TD 65536  
 SOLVENT CDCl3  
 NS 1  
 DS 0  
 SWH 3591.954 Hz  
 FIDRES 0.054809 Hz  
 AQ 9.1226616 sec  
 RG 322.5  
 DW 139.200 usec  
 DE 6.00 usec  
 TE 300.0 K  
 D1 1.00000000 sec

----- CHANNEL f1 -----  
 NUC1 1H  
 P1 16.50 usec  
 PL1 -6.00 dB  
 SFO1 300.1317107 MHz

F2 - Processing parameters  
 SI 32768  
 SF 300.1300000 MHz  
 WDW EM  
 SSB 0  
 LB 0.30 Hz  
 GB 0  
 PC 1.00

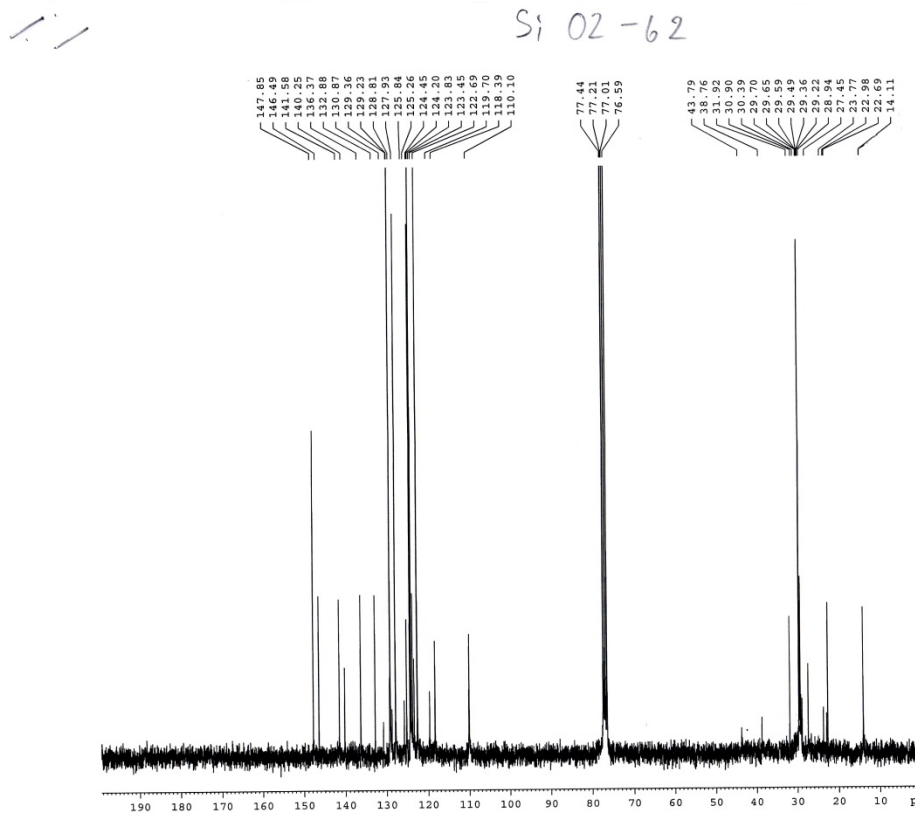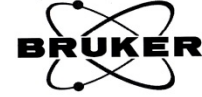

Current Data Parameters  
 NAME Nov2010  
 EXPNO 313  
 PROCNO 1

F2 - Acquisition Parameters  
 Date\_ 20101224  
 Time 12.37  
 INSTRUM av300  
 PROBHD 5 mm BBO BB-1H  
 PULPROG zgdc  
 TD 65536  
 SOLVENT CDCl3  
 NS 2048  
 DS 2  
 SWH 17985.611 Hz  
 FIDRES 0.274439 Hz  
 AQ 1.8219508 sec  
 RG 7298.2  
 DW 27.800 usec  
 DE 6.00 usec  
 TE 300.0 K  
 D1 2.00000000 sec  
 d11 0.03000000 sec

----- CHANNEL f1 -----  
 NUC1 13C  
 P1 7.60 usec  
 PL1 -3.00 dB  
 SFO1 75.4752953 MHz

----- CHANNEL f2 -----  
 CPDPRG2 waltz16  
 NUC2 1H  
 PCPD2 96.00 usec  
 PL2 -6.00 dB  
 PL12 -6.00 dB  
 SFO2 300.1312005 MHz

F2 - Processing parameters  
 SI 32768  
 SF 75.4677490 MHz  
 WDW EM  
 SSB 0  
 LB 1.00 Hz  
 GB 0  
 PC 1.40
